1  
2  
3  
4  
5  
6  
7  
8  
9  
10  
11  
12  
13  
14  
15  
16  
17  
18  
19  
20  
21

# Prevalence and Determinants of E-Cigarette Use Among Diploma Students in a Vocational College: A Cross-Sectional Study

Siti Munisah Mohd Shoaib<sup>1,2</sup>, Norliza Ahmad<sup>1\*</sup>, Aidalina Mahmud<sup>1</sup>

<sup>1</sup>Department of Community Health, Faculty of Medicine and Health Sciences, Universiti Putra  
Malaysia, Serdang, Selangor Malaysia.

<sup>2</sup>Ministry of Health, Putrajaya, Malaysia.

\*Corresponding author:

Email: [lizaahmad@upm.edu.my](mailto:lizaahmad@upm.edu.my)

These authors contributed equally to this work.

NOTE: This preprint reports new research that has not been certified by peer review and should not be used to guide clinical practice.

## 22 ABSTRACT

23 **Introduction:** The prevalence of e-cigarette use is increasing globally, particularly among  
24 young adults which can predispose them to various health risks. This study aimed to determine  
25 the prevalence and factors associated with e-cigarette use among diploma students in a  
26 vocational college in a state in Malaysia.

27 **Methodology:** A cross-sectional study using probability proportionate to size sampling was  
28 conducted among 700 diploma students at a vocational college in Malaysia. A validated, self-  
29 administered questionnaire was distributed through the online method from April to May 2024.  
30 Bivariate analysis was done using Pearson's chi-square test or Fisher's exact and simple  
31 logistic regression. Multivariable analysis was performed using multiple logistic regression for  
32 variables with a  $p < 0.25$  in the bivariate analysis. A value of  $p < 0.05$  was considered statistically  
33 significant, with a 95% confidence interval.

34 **Results:** The response rate was 87.7% with the prevalence of e-cigarette use was 29.0%.  
35 Factors significantly associated with e-cigarette use included male (aOR = 5.2, 95% CI: 2.7-  
36 10.1), other races (aOR = 83.1, 95% CI: 2.2-3146.3), perceived e-cigarette aids in quit smoking  
37 (aOR = 1.6, 95% CI: 1.2-2.1), perceived e-cigarette does not contain the toxic chemicals found  
38 in conventional cigarette (aOR = 1.4, 95% CI: 1.0-2.0), having close friends who use  
39 conventional cigarette (aOR = 2.1, 95% CI: 1.0-4.1) or e-cigarette (aOR = 8.0, 95% CI: 2.3-  
40 28.1), e-cigarette exposure on television (aOR = 2.1, 95% CI: 1.0-4.2), positive attitude towards  
41 e-cigarette (aOR = 1.2, 95% CI: 1.1-1.2), higher willingness to use (aOR = 1.2, 95% CI: 1.0-  
42 1.3), and higher intention to use (aOR = 1.4, 95% CI: 1.2-1.5).

43 **Conclusion:** Factors associated with e-cigarette use among diploma students included being  
44 male, other races (Bumiputera Sabah and Sarawak), positive health risks perceptions, peer  
45 influence, and exposure to e-cigarettes on television. Targeted interventions addressing these

46 factors may be more effective in changing social norms and reducing e-cigarette use among  
47 this population.

48 **Keywords:** vaping, young adults, associated factors, electronic nicotine delivery systems,  
49 Malaysia, prevalence, peer influence, intention

50

## 51 **Introduction**

52 E-cigarettes are devices that heat a liquid, typically containing nicotine, flavorings, and other  
53 substances to produce an aerosol that is inhaled by the user. E-cigarette use poses significant  
54 health risks, particularly to young adults, youth, and pregnant women (1). Currently, there are  
55 rising concerns about the increasing trend of e-cigarette use. Previous studies conducted among  
56 college and university students aged 18 to 26 years have reported a wide range of prevalence  
57 rates. A study in Malaysia in 2016 reported a prevalence of 20.4%, whereas other studies done  
58 in the U.S. in 2019, Thailand, and Malaysia in 2020 reported a prevalence of 24.8%, 18.1%,  
59 and 12.4% respectively (2–5). A study conducted among vocational students in Thailand in  
60 2019 reported an even higher prevalence of current e-cigarette use (28.7%), with the highest  
61 percentage seen among respondents aged 20 years and older (30.8%) (6).

62

63 Nicotine contained in e-cigarette liquid may impair brain cognition and development, increase  
64 impulsive behavior, and negatively impact psychosocial health in young adults (7–9). Other  
65 chemicals in e-cigarettes, such as flavorings, diacetyl, propylene glycol (PG), carbon  
66 monoxide, formaldehyde, and polycyclic aromatic compounds, are also very harmful to health  
67 (7,10). In fact, respiratory problems, such as asthma, chronic obstructive pulmonary disease,  
68 eosinophilic pneumonia, epiglottitis, bronchitis, and acute respiratory distress, have been  
69 linked to e-cigarette use (7). Additionally, e-cigarette or vaping use-associated lung injury

70 (EVALI) has been reported among e-cigarette users, which is caused by tetrahydrocannabinol  
71 (THC) and vitamin E acetate present in some e-cigarettes (11,12).

72

73 Other harmful health risks of e-cigarette use include accidental nicotine overdose, increased  
74 risk of cardiopulmonary diseases, subsequent illicit drug use, serving as a gateway to  
75 conventional cigarettes that may result in dual use of both types of cigarettes, and physical  
76 injuries from battery failures and explosions (7,13). Small liquid droplets produced by e-  
77 cigarette aerosols have also been detected in the environment and on surfaces, potentially  
78 causing second-hand and third-hand exposure to people nearby (14,15). Among those exposed  
79 to second-hand and third-hand e-cigarette aerosols smoker, respiratory problems (especially  
80 among those with existing airway conditions such as asthma), DNA damage, immediate  
81 modifications in respiratory mechanics and exhaled inflammatory biomarkers, and an  
82 increased risk of cardiovascular disease have been observed (14,16–18).

83

84 One of the intrapersonal factors of e-cigarette use is having lower levels of knowledge about  
85 the potential negative health outcomes of e-cigarette use (4). Other intrapersonal factors, such  
86 as poor health risk perceptions and poor mental health perceptions, have also been identified  
87 among e-cigarette users (5,19,20). E-cigarette use is also influenced by family members and  
88 peers, exposure to printed or online advertisements, the availability and affordability of e-  
89 cigarettes, positive attitudes towards e-cigarettes, higher intention and higher willingness to  
90 use, as well as engagement in high-risk behaviors have also been found to be associated with  
91 the use of e-cigarettes (5,6,19,21–28). In Malaysia, the National Health Morbidity Survey  
92 (NHMS) 2019 indicated that the highest prevalence was among the age group of 20 to 24 years  
93 (14.7%) (29). However, studies among students at vocational colleges on e-cigarette use are

94 scarce. Hence, this study aimed to identify factors associated with e-cigarette use among young  
95 adults currently studying at a vocational college in Selangor, Malaysia.

96

## 97 **Materials and Methods**

### 98 **Study design and population**

99 A cross-sectional study was conducted among diploma students at a vocational college in  
100 Selangor, Malaysia, from October 2023 to July 2024. Selangor, a state adjacent to Kuala  
101 Lumpur, the capital of Malaysia, was selected as the study site due to its high prevalence of e-  
102 cigarette use, as reported in the NHMS 2019. In addition, it houses the highest number of higher  
103 education institutions, with a total of 397,366 enrolments in 2022 (29,30). Inclusion criteria  
104 included students currently enrolled in semester two or beyond, and young adults aged 18 to  
105 26 years. Students who were on leave, not attending classes during the data collection period,  
106 or were suspended by the university were excluded.

107

### 108 **Sample size and sampling**

109 The required sample size was 700 participants, at 80% power, 95% confidence level, and 20%  
110 non-response rate. The sample size was determined using the two-population proportion  
111 formula, based on e-cigarette use and monthly family income from a previous study (5).  
112 Stratified random sampling with probability proportionate to size method was employed in this  
113 study. All 12 diploma programs (regarded as strata) in the selected college were included.  
114 Probability proportionate to size sampling was applied to each diploma course based on the  
115 calculated sample size. Finally, systematic random sampling was used to select eligible  
116 participants from each diploma course.

117

## 118 **Study instrument**

119 This study used a set of validated questionnaires adapted from previous research (20,24–  
120 26,28,31,32). It consisted of 12 sections. Part A of the questionnaire was regarding the  
121 sociodemographic characteristics and academic performance of the respondents. Part B of the  
122 questionnaire was regarding conventional cigarette and e-cigarette use profiles which were  
123 assessed by whether or not the respondent had smoked a conventional cigarette or use e-  
124 cigarette in the past 30 days with three response options (31). E-cigarette users were then  
125 categorised into “never user” and “e-cigarette user” accordingly. Part C was regarding reasons  
126 for using e-cigarettes which were answered by those respondents who are occasional e-  
127 cigarette users and past month e-cigarette users only with six options were given (2). The  
128 answer options for the questions will be “Yes” and “No”. Part D was regarding knowledge of  
129 e-cigarettes with eight statements (26). The answer options were “Yes”, “No”, and “Don’t  
130 know”. Those who answered “Don’t know” were interpreted as wrong answers which were  
131 scored zero, while the correct answer was scored one. The minimum score was 0 and the  
132 maximum score was 8. A higher score will reflect good knowledge of e-cigarettes.

133

134 Part E consisted of two constructs on perceptions. The first construct consisted of five  
135 statements to assess health risk perceptions on e-cigarette (25). It was scored using a 5-point  
136 Likert scale (1-totally disagree, 2-disagree, 3-unsure, 4-agree, 5-totally agree). The minimum  
137 score was 5 and the maximum score was 25. A lower score reflected that the respondents have  
138 a strong belief in the health risks of e-cigarettes. The second construct was on mental health  
139 perceptions (20). It consisted of four questions on perceived anxiety, depression, loneliness,  
140 and stress symptoms during the past month. The questions were measured using a 5-point  
141 Likert scale (1-never, 2-rarely, 3-sometimes, 4-often, 5-always). The minimum score was 4  
142 and the maximum score was 20. A higher score reflected poor mental health perceptions.

143

144 Part F was regarding social influences with two statements about behaviour of conventional  
145 cigarette and e-cigarette use among family members and another two statements about  
146 behaviour of conventional cigarette and e-cigarette use among close friend (25). The answer  
147 option was “Yes” and “No”. Part G was regarding advertising media influences based on the  
148 exposure to e-cigarette advertisements (24). A statement with six options was given with “Yes”  
149 and “No” answer options displayed for each option.

150

151 Part H was regarding e-cigarette availability and affordability (25). The availability was  
152 explored by whether the respondents think it is difficult to get e-cigarettes. Meanwhile, the  
153 affordability was explored by whether the respondents think the price of e-cigarettes is  
154 affordable. The answer options for both questions were “Yes” and “No”. Part I, part J and K  
155 was regarding attitude towards e-cigarettes, willingness to use, and intention to use respectively  
156 (32). Attitude towards e-cigarette consisted of seven statements while willingness to use  
157 consisted of three statements and was scored using a 5-point Likert scale (1-totally disagree, 2-  
158 disagree, 3-unsure, 4-agree, 5-totally agree). Meanwhile, intention to use consisted of three  
159 questions and scored using a 5-point Likert scale (1-very unlikely, 2-unlikely, 3-unsure, 4-  
160 likely, 5-very likely). A higher score reflected a more positive attitude towards e-cigarettes, a  
161 higher willingness to use e-cigarettes, and a higher intention to use e-cigarettes. Part L was  
162 regarding high-risk behaviours with three statements on alcohol use, illegal drug use, and  
163 unprotected sex with single or multiple sexual partners (28). The answer options were “Yes”  
164 and “No”.

165

166 Pre-testing was conducted among 30 students from a diploma course to assess the stability of  
167 the questionnaire. Data from this pre-test was excluded from the final analysis. The internal

168 consistency of the questionnaire was evaluated using Cronbach's alpha, with values ranging  
169 from 0.70 to 0.96, indicating good to excellent reliability (33). The Cronbach's alpha values  
170 for each construct are summarized in Table 1.

171

172 **Table 1: Summary of the Cronbach's alpha index value**

| Domain                         | Number of Items | Cronbach's Alpha |
|--------------------------------|-----------------|------------------|
| Health risk perception         | 5               | 0.70             |
| Mental health perceptions      | 6               | 0.77             |
| Attitude towards e-cigarette   | 7               | 0.89             |
| Willingness to use e-cigarette | 3               | 0.74             |
| Intention to use e-cigarette   | 3               | 0.96             |

173

### 174 **Data collection**

175 Data was collected online using Google Forms, which were distributed to respondents through  
176 the WhatsApp application. Data collection took place from April to May 2024. Prior to data  
177 collection, a brief presentation detailing the study's objectives and methodology was given to  
178 the head of the department. Respondent eligibility was assessed based on the inclusion and  
179 exclusion criteria.

180

### 181 **Statistical analysis**

182 Data were analyzed using IBM SPSS version 29.0. Prior to analysis, the data sets were  
183 examined for out-of-range values and assessed for normality. Continuous independent  
184 variables were presented as mean  $\pm$  standard deviation for normally distributed data and as  
185 median (interquartile range) for non-normally distributed data. Continuous independent  
186 variables, such as respondents' age, monthly family income, and GPA, were categorized  
187 accordingly. Categorical variables were presented as frequencies and percentages. Bivariate  
188 analysis was conducted using the chi-square test for categorical independent variables and  
189 simple logistic regression for continuous independent variables to assess associations with e-  
190 cigarette use.

191

192 Results of bivariate analyses with p-value  $<0.25$  were further tested for multicollinearity and  
193 interactions before being analyzed using multiple logistic regression to determine the factors  
194 associated with e-cigarette use (34). Three regression methods were employed: the "Enter"  
195 method, the "Forward LR" method, and the "Backward LR" method. The most parsimonious  
196 model that best fits the data was selected. Results were reported as crude and adjusted odds  
197 ratios, with statistical significance set at  $p < 0.05$ .

198

### 199 **Ethics approval and consent to participate**

200 Ethical clearance was obtained from the Ethics Committee for Research Involving Human  
201 Subjects (JKEUPM), Universiti Putra Malaysia (JKEUPM-2024-193), in accordance with  
202 ethical standards. Approval from the Polytechnic and Community College Education  
203 Department, Ministry of Higher Education, was obtained prior to the pre-test and data  
204 collection. Online consent was obtained from all respondents via Google Forms. All  
205 information and details collected from the respondents were kept anonymous and transferred  
206 to a password-protected database linked to student identification created for this study. Access  
207 to this database was restricted to the investigators and will be maintained for seven years after  
208 the completion of the study, after which it will be deleted.

209

## 210 **Results**

211 Out of 700 randomly selected respondents invited from the sampling list, 614 students  
212 participated, resulting in an overall response rate of 87.7%. The prevalence of e-cigarette use  
213 in this study was 29.0%. Most respondents were aged between 18 and 20 years (73.0%), male  
214 (55.4%), of Malay ethnicity (87.6%), had a household average monthly income in the lower  
215 40% (B40) income group (83.9%), and achieved a Grade Point Average (GPA) grade of B

216 (76.2%). Table 2 presents the distribution of respondents according to sociodemographic  
 217 characteristics and academic performance.

218

219 **Table 2: Distribution of respondents according to sociodemographic characteristics and**  
 220 **academic performance (n=614)**

| Respondent characteristics   | Mean±SD / Median (IQR) | Frequency (n) | Percentage (%) |
|------------------------------|------------------------|---------------|----------------|
| <b>Age</b>                   | 20 (2)                 |               |                |
| 18 – 20 years old            |                        | 448           | 73.0           |
| 21 – 25 years old            |                        | 166           | 27.0           |
| <b>Sex</b>                   |                        |               |                |
| Male                         |                        | 340           | 55.4           |
| Female                       |                        | 274           | 44.6           |
| <b>Race</b>                  |                        |               |                |
| Malay                        |                        | 538           | 87.6           |
| Chinese                      |                        | 14            | 2.3            |
| Indian                       |                        | 53            | 8.6            |
| Others                       |                        | 9             | 1.5            |
| <b>Monthly family income</b> | 3000 (3000)            |               |                |
| B40                          |                        | 515           | 83.9           |
| M40                          |                        | 78            | 12.7           |
| T20                          |                        | 21            | 3.4            |
| <b>GPA result</b>            | 3.21±0.41              |               |                |
| A                            |                        | 93            | 15.1           |
| B                            |                        | 468           | 76.2           |
| C                            |                        | 53            | 8.7            |

221

222 The overall mean score for knowledge was 4.60±1.64 out of 8. Respondents were almost  
 223 equally distributed between those scoring 50% or below (45.3%) and those scoring above 50%  
 224 (54.7%). Among the respondents, only 10 (1.6%) answered all the questions correctly, while  
 225 13 (2.1%) scored zero. Most respondents (88.6%) correctly identified that e-cigarettes  
 226 represent a new form of addiction in society. Meanwhile, 75.2% incorrectly believed that e-  
 227 cigarettes do not contain tar. Details on the distribution of knowledge among respondents are  
 228 summarized in Table 3.

229

230 **Table 3: Distribution of respondents according to knowledge of e-cigarettes (n=614)**

| Knowledge of e-cigarette                        | Correct answer | Incorrect answer |
|-------------------------------------------------|----------------|------------------|
|                                                 | Frequency (%)  | Frequency (%)    |
| E-cigarettes do not harm the health of users    | 428 (69.7)     | 186 (30.3)       |
| The liquid in e-cigarettes may contain nicotine | 516 (84.0)     | 98 (16.0)        |

|                                                                                          |            |            |
|------------------------------------------------------------------------------------------|------------|------------|
| E-cigarettes do not contain tar                                                          | 152 (24.8) | 462 (75.2) |
| The sale of e-cigarettes has been banned throughout Malaysia                             | 312 (50.8) | 302 (49.2) |
| The use of e-cigarettes is one of a safe way to quit smoking                             | 388 (63.2) | 226 (36.8) |
| The liquid content in e-cigarettes has been adjusted by the Malaysian Ministry of Health | 223 (36.3) | 391 (63.7) |
| E-cigarette is a new form of addiction in society                                        | 544 (88.6) | 70 (11.4)  |
| The use of e-cigarettes has been declared illegal by the National Fatwa Council          | 260 (42.3) | 354 (57.7) |

231  
 232 Results of bivariate analyses identified eleven categorical independent variables and ten  
 233 continuous independent variables with a p-value <0.25. Multiple logistic regression analysis  
 234 using the "Forward LR" method revealed ten statistically significant factors: sex, race,  
 235 perceiving that e-cigarettes aid in quitting smoking, perceiving that e-cigarettes do not contain  
 236 toxic chemicals found in conventional cigarettes, e-cigarette and conventional cigarette usage  
 237 by close friends, exposure to e-cigarette on television, attitude towards e-cigarettes, willingness  
 238 to use, and intention to use (see Table 4). These determinants were consistent with the Hosmer  
 239 and Lemeshow goodness-of-fit test ( $\chi^2=11.049$ ,  $df=8$ ,  $p=0.199$ ). This model correctly classified  
 240 88.4% of e-cigarette use cases.

241  
 242 The model indicates that male respondents were five times more likely to use e-cigarettes  
 243 compared to females (aOR = 5.2, 95% CI: 2.7-10.1), while respondents from other races  
 244 (Bumiputera Sabah and Sarawak) were 83 times more likely to use e-cigarettes compared to  
 245 Chinese (aOR = 83.1, 95% CI: 2.2-3146.3). A one-unit increase in the perception that e-  
 246 cigarettes aid in quitting smoking was associated with a 1.6-fold increase in the odds of e-  
 247 cigarette use (aOR = 1.6, 95% CI: 1.2-2.1). Similarly, for each one-unit increase in the  
 248 perception that e-cigarettes do not contain the toxic chemicals found in conventional cigarettes,  
 249 the odds of e-cigarette use increased by 1.4 times (aOR = 1.4, 95% CI: 1.0-2.0).

250

251 Additionally, having close friends who smoke conventional cigarettes doubled the likelihood  
 252 of e-cigarette use (aOR = 2.1, 95% CI: 1.0-4.1), while having close friends who use e-cigarettes  
 253 increased the likelihood by eight times (aOR = 8.0, 95% CI: 2.3-28.1). Exposure to e-cigarette  
 254 use on television was associated with a twofold increase in e-cigarette use (aOR = 2.1, 95%  
 255 CI: 1.0-4.2). Moreover, a one-unit increase in positive attitudes towards e-cigarettes was  
 256 associated with a 1.2-fold increase in the odds of e-cigarette use (aOR = 1.2, 95% CI: 1.1-1.2).  
 257 Similarly, each one-unit increase in willingness to use and intention to use was linked to a 1.2-  
 258 fold (aOR = 1.2, 95% CI: 1.0-1.3) and 1.4-fold (aOR = 1.4, 95% CI: 1.2-1.5) increase in the  
 259 odds of e-cigarette use, respectively. Collectively, these variables accounted for 68.9% of the  
 260 variance in e-cigarette use among diploma students. However, 31.1% of the variance remains  
 261 unexplained, indicating the need for further investigation into additional influencing factors.

262

263 **Table 4: Determinants of e-cigarette use**

| Variables                                                  | Simple logistic regression |                   | Multiple logistic regression |       |             |        |          |                   |
|------------------------------------------------------------|----------------------------|-------------------|------------------------------|-------|-------------|--------|----------|-------------------|
|                                                            | Crude OR                   | p-value           | Coefficient                  | SE    | Adjusted OR | 95% CI |          | p-value           |
|                                                            |                            |                   |                              |       |             | Upper  | Lower    |                   |
| <b>Intercept</b>                                           |                            |                   | -11.653                      |       |             |        |          |                   |
| <b>Age</b>                                                 |                            |                   |                              |       |             |        |          |                   |
| 18 – 20 years                                              | Ref                        |                   |                              |       |             |        |          |                   |
| 21 – 26 years                                              | 1.8                        | <b>0.002*</b>     |                              |       |             |        |          |                   |
| <b>Sex</b>                                                 |                            |                   |                              |       |             |        |          |                   |
| Female                                                     | Ref                        |                   |                              |       |             |        |          |                   |
| Male                                                       | 7.3                        | <b>&lt;0.001*</b> | 1.645                        | 0.342 | 5.2         | 2.650  | 10.127   | <b>&lt;0.001*</b> |
| <b>Race</b>                                                |                            |                   |                              |       |             |        |          |                   |
| Chinese                                                    | Ref                        |                   |                              |       |             |        |          |                   |
| Malay                                                      | 5.5                        | 0.102             | 1.161                        | 1.473 | 3.2         | 0.178  | 57.340   | 0.430             |
| Indian                                                     | 3.4                        | 0.252             | 1.385                        | 1.549 | 4.0         | 0.192  | 83.213   | 0.371             |
| Others                                                     | 26.0                       | <b>0.009*</b>     | 4.420                        | 1.854 | 83.1        | 2.193  | 3146.339 | <b>0.017*</b>     |
| <b>GPA result</b>                                          |                            |                   |                              |       |             |        |          |                   |
| A                                                          | Ref                        |                   |                              |       |             |        |          |                   |
| B                                                          | 2.5                        | <b>0.003</b>      |                              |       |             |        |          |                   |
| C                                                          | 7.4                        | <b>&lt;0.001*</b> |                              |       |             |        |          |                   |
| <b>Knowledge of e-cigarette</b>                            | -0.2                       | <b>0.005*</b>     |                              |       |             |        |          |                   |
| <b>Health risk perceptions</b>                             |                            |                   |                              |       |             |        |          |                   |
| E-cigarettes help cut down the number of cigarettes smoked | 0.3                        | <b>&lt;0.001*</b> |                              |       |             |        |          |                   |

| Variables                                                                  | Simple logistic regression |         | Multiple logistic regression |       |             |        |        |         |
|----------------------------------------------------------------------------|----------------------------|---------|------------------------------|-------|-------------|--------|--------|---------|
|                                                                            | Crude OR                   | p-value | Coefficient                  | SE    | Adjusted OR | 95% CI |        | p-value |
|                                                                            |                            |         |                              |       |             | Upper  | Lower  |         |
| E-cigarettes aid in quitting smoking                                       | 0.4                        | <0.001* | 0.459                        | 0.146 | 1.6         | 1.189  | 2.108  | 0.002*  |
| E-cigarettes don't contain toxic chemicals found in conventional cigarette | 0.3                        | 0.002   | 0.357                        | 0.165 | 1.4         | 1.035  | 1.972  | 0.030*  |
| E-cigarettes are less harmful                                              | 0.3                        | <0.001* |                              |       |             |        |        |         |
| E-cigarettes are less addictive                                            | 0.4                        | <0.001* |                              |       |             |        |        |         |
| <b>Conventional cigarette usage by family members</b>                      |                            |         |                              |       |             |        |        |         |
| No                                                                         | Ref                        |         |                              |       |             |        |        |         |
| Yes                                                                        | 1.5                        | 0.017*  |                              |       |             |        |        |         |
| <b>Conventional cigarette usage by close friends</b>                       |                            |         |                              |       |             |        |        |         |
| No                                                                         | Ref                        |         |                              |       |             |        |        |         |
| Yes                                                                        | 6.0                        | <0.001* | 0.721                        | 0.346 | 2.1         | 1.043  | 4.053  | 0.037*  |
| <b>E-cigarette usage by close friends</b>                                  |                            |         |                              |       |             |        |        |         |
| No                                                                         | Ref                        |         |                              |       |             |        |        |         |
| Yes                                                                        | 12.4                       | <0.001* | 2.088                        | 0.636 | 8.1         | 2.320  | 28.072 | 0.001*  |
| <b>On television</b>                                                       |                            |         |                              |       |             |        |        |         |
| No                                                                         | Ref                        |         |                              |       |             |        |        |         |
| Yes                                                                        | 1.6                        | 0.030*  | 0.724                        | 0.359 | 2.1         | 2.062  | 1.020  | 0.044*  |
| Attitude towards e-cigarette                                               | 0.2                        | <0.001* | 0.151                        | 0.028 | 1.2         | 1.162  | 1.101  | <0.001* |
| Willingness to use                                                         | 0.4                        | <0.001* | 0.163                        | 0.062 | 1.2         | 1.177  | 1.041  | 0.009*  |
| Intention to use                                                           | 0.4                        | <0.001* | 0.300                        | 0.042 | 1.4         | 1.350  | 1.243  | <0.001* |
| <b>Alcohol use</b>                                                         |                            |         |                              |       |             |        |        |         |
| No                                                                         | Ref                        |         |                              |       |             |        |        |         |
| Yes                                                                        | 2.4                        | 0.007*  |                              |       |             |        |        |         |
| <b>Illegal drugs use</b>                                                   |                            |         |                              |       |             |        |        |         |
| No                                                                         | Ref                        |         |                              |       |             |        |        |         |
| Yes                                                                        | 3.3                        | 0.021*  |                              |       |             |        |        |         |
| <b>Unprotected sex</b>                                                     |                            |         |                              |       |             |        |        |         |
| No                                                                         | Ref                        |         |                              |       |             |        |        |         |
| Yes                                                                        | 4.3                        | <0.001* |                              |       |             |        |        |         |

264 Notes: Multiple logistic regression (Forward LR), no interaction ( $p > 0.05$ ), no multicollinearity, Hosmer and  
 265 Lemeshow goodness of fit test ( $p = 0.199$ ), Omnibus model of coefficient ( $p < 0.001$ ), Nagelkerke  $R^2$ : 0.689  
 266 \*Significant at  $p$ -value  $< 0.05$

267

## 268 **Discussion**

269 Our study analyzed e-cigarette use among diploma students at a vocational college in a state in  
270 Malaysia. The findings revealed that nearly one in three respondents were e-cigarette users, a  
271 prevalence notably higher than that reported in previous research among students in tertiary  
272 institutions. For instance, a study among university students in the U.S. aged 18 to 25 years  
273 reported an e-cigarette use prevalence of 24.8%, while local studies among university students  
274 in Malaysia reported prevalences of 12.4% and 20.4% (2–4). In contrast, a study among  
275 students from 12 vocational institutions in Thailand reported a prevalence similar to our current  
276 study (28.7%) (6). Overall, the high prevalence of e-cigarette use observed in this study raises  
277 significant concerns, particularly among vocational students.

278

279 Most respondents were generally aware that e-cigarettes are harmful and represent a new form  
280 of addiction in society. However, more than half of the respondents were either unaware of or  
281 unsure about the ingredients in e-cigarette liquids, which is consistent with previous study (26).  
282 This highlights the critical need for enforcing greater transparency from manufacturers  
283 regarding product contents. Some e-cigarette liquids have been found to contain nicotine levels  
284 different from those indicated on the label (35). Overall, respondents' knowledge was rated as  
285 moderate, which is lower than the mean score of  $5.80 \pm 2.04$  reported in a previous study (26).  
286 Nevertheless, more than half of the respondents were aware of the potential health risks  
287 associated with e-cigarette use.

288

289 Regarding sex, previous studies have similarly reported a higher likelihood of e-cigarette use  
290 among males (5,28,36). In many countries and cultures, including Malaysia, the use of e-  
291 cigarettes by males is more socially accepted, whereas females who use e-cigarettes often face  
292 cultural disapproval. Female users are frequently perceived as having low moral values and are

293 subject to social ridicule (37). Additionally, males were found to have lower health literacy,  
294 seek health information less frequently than females, and are more likely to perceive e-  
295 cigarettes as less harmful, making them more prone to use e-cigarettes and engage in other  
296 high-risk behaviors (13,38–40).

297

298 Our findings showed that individuals from other races were over 80 times more likely to use  
299 e-cigarettes compared to the Chinese, while no significant association was observed for the  
300 Malay and Indian populations. This disparity may be attributed to specific cultural factors that  
301 predispose these groups to higher e-cigarette use, possibly reflecting greater acceptance of the  
302 behavior within their social norms. The National Health Morbidity Survey 2019 reported that  
303 the prevalence of e-cigarette use was higher among Bumiputera Sabah (5.1%) and Bumiputera  
304 Sarawak (5.0%) compared to Chinese (3.5%) (29). A similar finding was observed in a study  
305 where white individuals had a higher proportion of e-cigarette use compared to non-whites  
306 ( $\chi^2=8.287$ ,  $df=2$ ,  $p=0.016$ ) (31).

307

308 Regarding health risk perceptions, our findings are consistent with previous research, which  
309 reported a similar association (aOR = 5.197, 95% CI: 2.099-13.106;  $p<0.001$ ) (25). This  
310 perception may arise from the early introduction of e-cigarettes as a supposedly safer  
311 alternative to smoking, along with aggressive marketing, claiming that e-cigarettes helped with  
312 smoking cessation (13,41). However, e-cigarettes are not a safe alternative, as their use has  
313 been linked to significant harm, and some users have become dual users of both e-cigarettes  
314 and conventional cigarettes (7,42).

315

316 Our findings on the belief that e-cigarettes do not contain the toxic chemicals found in  
317 conventional cigarettes are consistent with a previous study, which showed that a significantly

318 higher percentage of e-cigarette users (15.5%) held this perception compared to non-users  
319 (7.3%) ( $p < 0.001$ ) (25). The e-cigarette market often promoted e-cigarettes as a healthier  
320 alternative to conventional cigarettes. However, recent findings indicate that the chemicals in  
321 e-cigarette liquids may cause more harm to users and those around them (15). Additionally,  
322 there is a lack of transparency regarding the ingredients and chemicals present in e-cigarette  
323 liquids (41,43).

324

325 Peer influence was found to be strongly associated with e-cigarette usage in this study.  
326 Specifically, the use of conventional cigarettes and e-cigarettes by close friends was found to  
327 be one of the factors in this study. Our findings align with previous research, which reported a  
328 significant association between having friends using conventional cigarettes and e-cigarette use  
329 ( $OR = 2.72$ , 95% CI: 1.87-3.95;  $p < 0.001$ ) (21). Similarly, a study in Thailand found a strong  
330 association between having friends who use e-cigarettes and e-cigarette usage ( $aOR = 10.48$ ,  
331 95% CI: 5.96-18.41) (5). This high level of association suggests that e-cigarettes might be  
332 increasingly viewed as a socially acceptable or preferred alternative to conventional cigarettes  
333 within peer groups. Peer influence significantly impacts individual behavior, especially among  
334 young adults, who are more likely to imitate the behaviors of those around them and affect  
335 each other's behavior (44,45). An individual who is offered an e-cigarette by their friends is  
336 most likely to accept the offer, which then will lead them to continue using it. They also felt  
337 more comfortable within the e-cigarette community (46).

338

339 Regarding exposure to e-cigarette use in mass media, such as television, our findings align with  
340 a previous U.S. study, which reported that young adults aged 18–24 who were exposed to e-  
341 cigarette advertisements on television had a significantly higher likelihood of e-cigarette use  
342 compared to other age groups ( $p < 0.05$ ) (47). Television, along with other print media, has been

343 shown to receive the largest share of e-cigarette advertising (48). However, these findings may  
344 vary by country, depending on the regulations governing e-cigarette advertising. In Malaysia,  
345 the e-cigarette is advertised via print media and social media platforms (41,43). The current  
346 trends in social media marketing and advertising should be carefully considered, especially  
347 since younger populations are among the highest users of these platforms. Exposure to e-  
348 cigarette marketing might have caused individuals to have perception that e-cigarettes are not  
349 harmful and do not cause addiction (48).

350

351 Another factor identified in this study was attitude. Our finding is consistent with a study  
352 conducted in Thailand, which demonstrated that a positive attitude towards e-cigarettes was  
353 associated with e-cigarette usage (aOR = 4.171, 95% CI: 2.25-7.734) (6). Additionally, non-  
354 smokers were nearly three times more likely to have a negative attitude towards e-cigarettes  
355 compared to smokers (aOR = 2.632, 95% CI: 1.725-3.589) (26). An individual's attitude  
356 towards e-cigarettes may be influenced by their knowledge, awareness, and health concerns.  
357 Attitude is also shaped by learning from others or through personal experience (49). The  
358 significant findings observed in this study may be related to the moderate level of knowledge  
359 about e-cigarettes among respondents, which could influence their likelihood of e-cigarette use.  
360 This suggests the importance of addressing misconceptions about e-cigarettes and providing  
361 balanced information on e-cigarettes as attitudes can be influenced by presenting new and  
362 accurate information.

363

364 Our finding on the willingness aligns with previous research conducted among male high  
365 school students in Iran, which reported that higher willingness to smoke cigarettes was  
366 associated with cigarette smoking (OR 1.40, 95% CI: 1.21-1.50,  $p < 0.001$ ) (50). Higher  
367 willingness to use e-cigarettes may be influenced by various factors, such as the appeal of

368 flavors, particularly fruit flavors (51). Other than that, decision-making processes in young  
369 adults are often more impulsive and less governed by long-term considerations, as they often  
370 lack experience compared to older adults, who generally have more experience and better-  
371 developed judgment and foresight (52).

372

373 Intention is one of the key components studied in the reasoned action pathway of behavioral  
374 models, where it has been consistently reported that higher intention is associated with a greater  
375 likelihood of performing the behavior. In line with this, this study found a significant  
376 association between intention to use and e-cigarette use. Our finding is consistent with a  
377 previous study conducted among university students in Saudi Arabia, which found that higher  
378 intention was significantly associated with e-cigarette use (AOR 3.5, 95% CI: 2.3-5.3,  $p < 0.001$ )  
379 (53). These findings highlighted the importance of understanding and addressing behavioral  
380 intentions in interventions targeting high-risk behaviors. By identifying the factors that  
381 influence individuals' intentions to engage in such behaviors, interventions can be more  
382 effectively tailored to promote healthier choices and discourage behaviors associated with  
383 adverse health outcomes.

384

385 The strengths of this study include a satisfactory response rate of 87.7%, indicating a high level  
386 of participant engagement. This study is also the first to examine factors associated with e-  
387 cigarette use among students in a vocational college in Malaysia, addressing a significant gap  
388 in the literature. Another strength of this study is the sample's demographic diversity,  
389 characterized by an almost equal gender distribution and involvement of students from all  
390 diploma courses. This diversity ensures that the findings are representative and generalizable  
391 to the broader population of students in tertiary vocational institutions. Additionally, this study  
392 provides valuable insights into e-cigarette use within this specific demographic, contributing

393 to the limited research available on this topic in Malaysia. One limitation of the study is that  
394 the use of a self-administered questionnaire may have introduced inconsistencies due to social  
395 desirability bias or discrepancies between reported and actual experiences. Additionally, there  
396 is also limited generalizability of the findings as this study only focused on diploma students  
397 from one vocational college and covered a specific time frame.

398

## 399 **Conclusion**

400 In conclusion, this study revealed a notably high prevalence of e-cigarette use among diploma  
401 students in a tertiary vocational institution (29.0%), surpassing the rates reported in previous  
402 studies. The key determinants for e-cigarette use identified include male gender, Bumiputera  
403 Sabah and Sarawak ethnicity, health risk perception (such as beliefs that e-cigarettes aid in  
404 quitting smoking and do not contain toxic chemicals found in conventional cigarettes), social  
405 influences (such as friends' use of conventional cigarettes and e-cigarettes), exposure to e-  
406 cigarette advertising in media (particularly television), positive attitude towards e-cigarettes,  
407 and higher levels of willingness and intention to use e-cigarettes.

408

409 It is recommended that further studies be conducted across a more diverse range of vocational  
410 institutions in different regions of Malaysia to enhance the generalizability of the findings and  
411 to explore potential geographical differences in e-cigarette use among students. Additionally,  
412 qualitative research should be conducted, particularly focusing on other ethnic groups  
413 (Bumiputera Sabah and Sarawak), to gain a deeper understanding of the factors influencing e-  
414 cigarette use in these populations. This approach could refine strategies for preventing e-  
415 cigarette use among students. Future studies should also consider incorporating behavioral  
416 theory models to provide insights into the underlying motivations and decision-making  
417 processes related to e-cigarette use. These findings could significantly contribute to the

418 development of more effective behavioral change interventions targeted at the young adult  
419 population.

420

421 Health risks associated with e-cigarette use should be included as part of awareness and  
422 education programs, given the strong association between health risk perception and e-cigarette  
423 usage found in this study. Additionally, information on safe smoking cessation techniques, as  
424 well as knowledge about the ingredients and chemicals contained in e-cigarette liquids, should  
425 be included in these programs. The current Quit Smoking Program available at registered  
426 health clinics, hospitals, and pharmacies should be further promoted and expanded. The current  
427 misconception regarding e-cigarette ingredients might have made the public perceive that it is  
428 safer than conventional cigarettes.

429

430 A 'Quit Vaping' intervention program may be introduced in institutions for students who use e-  
431 cigarettes, potentially including peer support groups. This intervention program also may  
432 include promoting healthy behaviors and reducing the normalization of e-cigarette use within  
433 social circles, which may benefit the students. As television was identified as one of the key  
434 determinants in this study, using this medium to convey e-cigarette awareness and health  
435 education could be highly effective. To maximize the impact, collaboration with multiple  
436 agencies and stakeholders is essential to ensure comprehensive and accurate content that targets  
437 the young adult population. Besides being informative, the content should be creative and  
438 interactive, as to attract a younger population. Featuring young adults as the face of the  
439 campaign or even as hosts may also enhance its effectiveness

440

441 Other than that, enforcing transparency regulations on e-cigarette manufacturers regarding the  
442 disclosure of ingredients, particularly nicotine concentrations in e-cigarette liquids, could be a

443 strategic measure to ensure compliance with existing regulations. Strengthening restrictions on  
444 e-cigarette advertisements is also crucial. This should include a ban on both implicit and  
445 explicit advertisements on television and other platforms popular among young adults. This  
446 may help to limit the exposure of e-cigarette promotions to young adults.

447

## 448 **Acknowledgement**

449 The authors would like to express their gratitude to the Ministry of Higher Education for the  
450 cooperation and commitment given by the institution and diploma students involved in this  
451 study. The authors also would like to thank the Ministry of Higher Education for the  
452 permission to publish this article.

453

## 454 **Author Contributions**

455 **Conceptualization:** Siti Munisah Mohd Shoaib, Norliza Ahmad, Aidalina Mahmud

456 **Performed data collection:** Siti Munisah Mohd Shoaib

457 **Formal analysis:** Siti Munisah Mohd Shoaib, Norliza Ahmad

458 **Supervision:** Norliza Ahmad, Aidalina Mahmud

459 **Writing – original draft:** Siti Munisah Mohd Shoaib

460 **Writing – review & editing:** Norliza Ahmad, Aidalina Mahmud

461

## 462 **References**

- 463 1. Centers for Disease Control & Prevention. About E-Cigarettes (Vapes) [Internet]. 2024  
464 [cited 2024 Aug 30]. Available from: [https://www.cdc.gov/tobacco/e-](https://www.cdc.gov/tobacco/e-cigarettes/about.html?CDC_AAref_Val=https://www.cdc.gov/tobacco/basic_informati)  
465 [cigarettes/about.html?CDC\\_AAref\\_Val=https://www.cdc.gov/tobacco/basic\\_informati](https://www.cdc.gov/tobacco/basic_informati)  
466 [on/e-cigarettes/about-e-cigarettes.html](https://www.cdc.gov/tobacco/basic_informati)
- 467 2. Wan Puteh SE, Abdul Manap R, Hassan TM, Ahmad IS, Idris IB, Md Sham F, et al. The  
468 use of e-cigarettes among university students in Malaysia. Tob Induc Dis [Internet].

- 469 2018 Dec 10 [cited 2024 Aug 30];16(57). Available from:  
470 <https://www.ncbi.nlm.nih.gov/pmc/articles/PMC6659562/>
- 471 3. Helmi Ali A, Mohamad Azam IM, Yusof NN, Hussin S. Cross Sectional Study:  
472 Cigarette Smoking and the Usage of E-cigarettes Among the Students of University of  
473 Cyberjaya. *Asian Journal of Medicine and Health Sciences*. 2022 Jun;5(1).
- 474 4. Jones RD, Asare M, Lanning B. A Retrospective Cross-Sectional Study on the  
475 Prevalence of E-cigarette Use Among College Students. *J Community Health [Internet]*.  
476 2021 Feb 1 [cited 2024 Aug 30];46(1):195–202. Available from:  
477 <https://www.ncbi.nlm.nih.gov/pmc/articles/PMC7317082/>
- 478 5. Phetphum C, Prajongjeep A, Thawatchaijareonying K, Wongwuttiyan T, Wongjamnong  
479 M, Yossuwan S, et al. Personal and perceptual factors associated with the use of  
480 electronic cigarettes among university students in northern Thailand. *Tob Induc Dis*  
481 *[Internet]*. 2021 Apr 22 [cited 2024 Aug 30];19(31). Available from:  
482 <https://www.ncbi.nlm.nih.gov/pmc/articles/PMC8059432/>
- 483 6. Benjakul S, Nakju S, Termsirikulchai L. Factors associated with e-cigarette use among  
484 vocational students: A cross-sectional multistage cluster survey, Thailand. *Tob Induc*  
485 *Dis [Internet]*. 2023 Sep [cited 2024 Aug 30];21(120). Available from:  
486 [https://www.tobaccoinduceddiseases.org/Factors-associated-with-e-cigarette-use-](https://www.tobaccoinduceddiseases.org/Factors-associated-with-e-cigarette-use-among-vocational-students-A-cross-sectional,170421,0,2.html)  
487 [among-vocational-students-A-cross-sectional,170421,0,2.html](https://www.tobaccoinduceddiseases.org/Factors-associated-with-e-cigarette-use-among-vocational-students-A-cross-sectional,170421,0,2.html)
- 488 7. Lyzwinski LN, Naslund JA, Miller CJ, Eisenberg MJ. Global youth vaping and  
489 respiratory health: epidemiology, interventions, and policies. *NPJ Prim Care Respir Med*  
490 *[Internet]*. 2022 Apr 11 [cited 2024 Aug 30];32(14). Available from:  
491 <https://www.ncbi.nlm.nih.gov/pmc/articles/PMC9001701/>
- 492 8. Centers for Disease Control & Prevention. E-Cigarette, or Vaping, Products Visual  
493 Dictionary *[Internet]*. 2019 [cited 2024 Aug 30]. Available from:  
494 [https://www.cdc.gov/tobacco/basic\\_information/e-cigarettes/pdfs/ecigarette-or-vaping-](https://www.cdc.gov/tobacco/basic_information/e-cigarettes/pdfs/ecigarette-or-vaping-products-visual-dictionary-508.pdf)  
495 [products-visual-dictionary-508.pdf](https://www.cdc.gov/tobacco/basic_information/e-cigarettes/pdfs/ecigarette-or-vaping-products-visual-dictionary-508.pdf)
- 496 9. Centers for Disease Control & Prevention. More than 2.5 Million Youth Reported E-  
497 Cigarette Use in 2022 *[Internet]*. 2022 [cited 2024 Aug 30]. Available from:  
498 <https://www.cdc.gov/media/releases/2022/p1007-e-cigarette-use.html>
- 499 10. Ministry of Health Malaysia. National Strategic Plan for The Control of Tobacco &  
500 Smoking Products 2021-2030 *[Internet]*. 2021 [cited 2024 Aug 30]. Available from:  
501 [https://www.moh.gov.my/moh/resources/Penerbitan/Rujukan/NCD/National%20Strate-](https://www.moh.gov.my/moh/resources/Penerbitan/Rujukan/NCD/National%20Strategic%20Plan/NCDTembakau20212030.pdf)  
502 [gic%20Plan/NCDTembakau20212030.pdf](https://www.moh.gov.my/moh/resources/Penerbitan/Rujukan/NCD/National%20Strategic%20Plan/NCDTembakau20212030.pdf)
- 503 11. Centers for Disease Control & Prevention. Outbreak of Lung Injury Associated with the  
504 Use of E-Cigarette, or Vaping, Product *[Internet]*. 2020 [cited 2024 Aug 30]. Available  
505 from: [https://archive.cdc.gov/www\\_cdc\\_gov/tobacco/basic\\_information/e-](https://archive.cdc.gov/www_cdc_gov/tobacco/basic_information/e-cigarettes/severe-lung-disease.html)  
506 [cigarettes/severe-lung-disease.html](https://archive.cdc.gov/www_cdc_gov/tobacco/basic_information/e-cigarettes/severe-lung-disease.html)
- 507 12. Blount BC, Karwowski MP, Shields PG, Morel-Espinosa M, Valentin-Blasini L,  
508 Gardner M, et al. Vitamin E Acetate in Bronchoalveolar-Lavage Fluid Associated with  
509 EVALI. *New England Journal of Medicine [Internet]*. 2020 Feb 20 [cited 2024 Aug  
510 30];382(8):697–705. Available from:  
511 <https://www.ncbi.nlm.nih.gov/pmc/articles/PMC7032996/>
- 512 13. U.S. Department of Health and Human Services. E-Cigarette Use Among Youth and  
513 Young Adults: A Report of the Surgeon General *[Internet]*. Atlanta, GA: U.S.  
514 Department of Health and Human Services, Centers for Disease Control and Prevention,  
515 National Center for Chronic Disease Prevention and Health Promotion, Office on  
516 Smoking and Health; 2016 [cited 2024 Aug 30]. Available from:  
517 [https://www.cdc.gov/tobacco/sgr/e-cigarettes/pdfs/2016\\_sgr\\_entire\\_report\\_508.pdf](https://www.cdc.gov/tobacco/sgr/e-cigarettes/pdfs/2016_sgr_entire_report_508.pdf)

- 518 14. Almeida-da-Silva CLC, Matshik Dakafay H, O'Brien K, Montierth D, Xiao N, Ojcius  
519 DM. Effects of electronic cigarette aerosol exposure on oral and systemic health.  
520 Biomed J [Internet]. 2021 Jun [cited 2024 Aug 30];44(3):252–9. Available from:  
521 <https://www.ncbi.nlm.nih.gov/pmc/articles/PMC8358192/>
- 522 15. Walley SC, Wilson KM, Winickoff JP, Groner J. A public health crisis: Electronic  
523 cigarettes, vape, and JUUL. Pediatrics. 2019 Jun;143(6).
- 524 16. Umphres SS, Alarabi AB, Ali HEA, Khasawneh FT, Alshbool FZ. Investigation of the  
525 impact of thirdhand e-cigarette exposure on platelet function: A pre-clinical study. Tob  
526 Induc Dis [Internet]. 2024 Mar [cited 2024 Aug 30];22(56):1–10. Available from:  
527 <https://www.ncbi.nlm.nih.gov/pmc/articles/PMC10980912/>
- 528 17. Tzortzi A, Teloniatis S, Matiampa G, Bakelas G, Tzavara C, Vyzikidou VK, et al.  
529 Passive exposure of non-smokers to E-Cigarette aerosols: Sensory irritation, timing and  
530 association with volatile organic compounds. Environ Res [Internet]. 2020 Mar [cited  
531 2024 Aug 30];182. Available from:  
532 <https://www.sciencedirect.com/science/article/pii/S0013935119307601?via%3Dihub>
- 533 18. Bayly JE, Bernat D, Porter L, Choi K. Secondhand Exposure to Aerosols From  
534 Electronic Nicotine Delivery Systems and Asthma Exacerbations Among Youth With  
535 Asthma. Chest [Internet]. 2019 Jan [cited 2024 Aug 30];155(1):88–93. Available from:  
536 <https://www.ncbi.nlm.nih.gov/pmc/articles/PMC6688978/>
- 537 19. Wipfli H, Bhuiyan MR, Qin X, Gainullina Y, Palaganas E, Jimba M, et al. Tobacco use  
538 and E-cigarette regulation: Perspectives of University Students in the Asia-Pacific.  
539 Addictive Behaviors [Internet]. 2020 Aug [cited 2024 Aug 30];107. Available from:  
540 <https://www.sciencedirect.com/science/article/pii/S0306460319310998>
- 541 20. Cabral P. E-cigarette use and intentions related to psychological distress among  
542 cigarette, e-cigarette, and cannabis vape users during the start of the COVID-19  
543 pandemic. BMC Psychol [Internet]. 2022 Dec 1 [cited 2024 Aug 30];10(201). Available  
544 from: [https://bmcpyschology.biomedcentral.com/articles/10.1186/s40359-022-00910-](https://bmcpyschology.biomedcentral.com/articles/10.1186/s40359-022-00910-9#citeas)  
545 [9#citeas](https://bmcpyschology.biomedcentral.com/articles/10.1186/s40359-022-00910-9#citeas)
- 546 21. Wang JW, Cao SS, Hu RY. Smoking by family members and friends and electronic-  
547 cigarette use in adolescence: A systematic review and meta-analysis [Internet]. Vol. 16,  
548 Tobacco Induced Diseases. International Society for the Prevention of Tobacco Induced  
549 Diseases; 2018 [cited 2024 Aug 30]. Available from:  
550 <https://www.ncbi.nlm.nih.gov/pmc/articles/PMC6659504/>
- 551 22. Coleman M, Donaldson CD, Crano WD, Pike JR, Stacy AW. Associations Between  
552 Family and Peer E-Cigarette Use with Adolescent Tobacco and Marijuana Usage: A  
553 Longitudinal Path Analytic Approach. Nicotine & Tobacco Research [Internet]. 2021  
554 May [cited 2024 Aug 30];23(5):849–55. Available from:  
555 <https://www.ncbi.nlm.nih.gov/pmc/articles/PMC8628870/>
- 556 23. Ali FRM, Dave DM, Colman GJ, Wang X, Saffer H, Marynak KL, et al. Association of  
557 e-cigarette advertising with e-cigarette and cigarette use among US adults. Addiction  
558 [Internet]. 2021 May 1 [cited 2024 Aug 30];116(5):1212–23. Available from:  
559 <https://www.ncbi.nlm.nih.gov/pmc/articles/PMC8434873/>
- 560 24. Chen-Sankey JC, Unger JB, Bansal-Travers M, Niederdeppe J, Bernat E, Choi K. E-  
561 cigarette marketing exposure and subsequent experimentation among youth and young  
562 adults. Pediatrics [Internet]. 2019 Nov [cited 2024 Aug 30];144(5). Available from:  
563 <https://www.ncbi.nlm.nih.gov/pmc/articles/PMC6836725/>
- 564 25. Fauzi R, Areesantichai C. Factors associated with electronic cigarettes use among  
565 adolescents in Jakarta, Indonesia. J Health Res [Internet]. 2022 [cited 2024 Aug  
566 30];36(1):2–11. Available from:  
567 <https://www.emerald.com/insight/content/doi/10.1108/JHR-01-2020->

- 568 0008/full/pdf?title=factors-associated-with-electronic-cigarettes-use-among-  
569 adolescents-in-jakarta-indonesia
- 570 26. Jaafar H, Mohd Razi NA, Tengku Mohd TAM, Mohd Noor N ‘Ayn, Mohd Rani MD,  
571 Abu Baharin MF, et al. Knowledge, Attitude and Practice on Electronic Cigarette and  
572 their Associated Factors among Undergraduate Students in a Public University. *IIUM*  
573 *Medical Journal Malaysia* [Internet]. 2021 Apr [cited 2024 Aug 30];20(2):43–51.  
574 Available from:  
575 <https://journals.iium.edu.my/kom/index.php/imjm/article/view/506/1178>
- 576 27. Grant JE, Lust K, Fridberg DJ, King AC, Chamberlain SR. E-Cigarette Use (Vaping) is  
577 Associated with Illicit Drug Use, Mental Health Problems, and Impulsivity in University  
578 Students. *Annals of Clinical Psychiatry* [Internet]. 2019 Feb [cited 2024 Aug  
579 30];31(1):27–35. Available from:  
580 <https://www.ncbi.nlm.nih.gov/pmc/articles/PMC6420081/>
- 581 28. Seabrook JA, Twynstra J, Gilliland JA. Correlates of Lifetime and Past Month Vape Use  
582 in a Sample of Canadian University Students. *Subst Abuse* [Internet]. 2021 [cited 2024  
583 Aug 30];15. Available from: <https://www.ncbi.nlm.nih.gov/pmc/articles/PMC8549468/>
- 584 29. Institute for Public Health (IPH), National Institutes of Health, Ministry of Health  
585 Malaysia. National Health and Morbidity Survey (NHMS) 2019: Vol. I: NCDs – Non-  
586 Communicable Diseases: Risk Factors and other Health Problems [Internet]. 2020 [cited  
587 2024 Aug 30]. Available from:  
588 [https://iku.moh.gov.my/images/IKU/Document/REPORT/NHMS2019/Report\\_NHMS](https://iku.moh.gov.my/images/IKU/Document/REPORT/NHMS2019/Report_NHMS_2019-NCD_v2.pdf)  
589 [2019-NCD\\_v2.pdf](https://iku.moh.gov.my/images/IKU/Document/REPORT/NHMS2019/Report_NHMS_2019-NCD_v2.pdf)
- 590 30. Ministry of Higher Education. Statistik Pendidikan Tinggi 2022 - Makro Institusi  
591 Pendidikan Tinggi [Internet]. 2023 Jul [cited 2024 Aug 30]. Available from:  
592 [https://www.mohe.gov.my/en/download/statistics/2022-3/1177-statistik-pendidikan-](https://www.mohe.gov.my/en/download/statistics/2022-3/1177-statistik-pendidikan-tinggi-2022-bab-1-makro-institusi-pendidikan-tinggi/file)  
593 [tinggi-2022-bab-1-makro-institusi-pendidikan-tinggi/file](https://www.mohe.gov.my/en/download/statistics/2022-3/1177-statistik-pendidikan-tinggi-2022-bab-1-makro-institusi-pendidikan-tinggi/file)
- 594 31. Greer AE, Morgan K, Samuolis J, Diaz G, Merighi J, Mahoney P. An examination of  
595 electronic nicotine delivery system use among college students using social cognitive  
596 theory. *Journal of American College Health*. 2022;70(6):1839–47.
- 597 32. Vogel EA, Ramo DE, Rubinstein ML, Delucchi KL, Darrow SM, Costello C, et al.  
598 Effects of social media on adolescents’ willingness and intention to use e-cigarettes: An  
599 experimental investigation. *Nicotine and Tobacco Research* [Internet]. 2021 Apr 1 [cited  
600 2024 Aug 30];23(4):694–701. Available from:  
601 <https://www.ncbi.nlm.nih.gov/pmc/articles/PMC7976937/>
- 602 33. Tavakol M, Dennick R. Making sense of Cronbach’s alpha. *Int J Med Educ* [Internet].  
603 2011 [cited 2024 Aug 30];2:53–5. Available from:  
604 <https://www.ncbi.nlm.nih.gov/pmc/articles/PMC4205511/>
- 605 34. Hosmer DW, Lemeshow S. *Applied Logistic Regression*. Second.  
606 JohnWiley&Sons,Inc; 2000.
- 607 35. Bozier J, Chivers EK, Chapman DG, Larcombe AN, Bastian NA, Masso-Silva JA, et al.  
608 The Evolving Landscape of e-Cigarettes: A Systematic Review of Recent Evidence.  
609 *Chest*. 2020 May 1;157(5):1362–90.
- 610 36. Ahmed LA, Verlinden M, Alobeidli MA, Alahbabi RH, Alkatheeri R, Saddik B, et al.  
611 Patterns of tobacco smoking and nicotine vaping among university students in the united  
612 arab emirates: A cross-sectional study. *Int J Environ Res Public Health*. 2021 Jul  
613 19;18(14).
- 614 37. Indriani RC, Aulia F, Sianturi PA, Sundari P, Sembiring SUB, Milala YY, et al. The  
615 Phenomenon of Vaping in Female Students. *Indonesian Journal of Medical*  
616 *Anthropology* [Internet]. 2023 Oct 3 [cited 2024 Aug 30];4(2):44–9. Available from:

- 617 [https://www.researchgate.net/publication/374423754\\_The\\_Phenomenon\\_of\\_Vaping\\_in\\_Female\\_Students#fullTextFileContent](https://www.researchgate.net/publication/374423754_The_Phenomenon_of_Vaping_in_Female_Students#fullTextFileContent)  
618
- 619 38. Svendsen MT, Bak CK, Sørensen K, Pelikan J, Riddersholm SJ, Skals RK, et al.  
620 Associations of health literacy with socioeconomic position, health risk behavior, and  
621 health status: A large national population-based survey among Danish adults. *BMC*  
622 *Public Health* [Internet]. 2020 Apr 28 [cited 2024 Aug 30];20(1). Available from:  
623 <https://www.ncbi.nlm.nih.gov/pmc/articles/PMC7187482/>
- 624 39. Hassan S, Masoud O. Online health information seeking and health literacy among non-  
625 medical college students: gender differences. *J Public Health (Bangkok)*. 2021 Dec  
626 1;29(6):1267–73.
- 627 40. Martinović I, Un Kim S, Stanarević Katavić S. Study of health information needs among  
628 adolescents in Croatia shows distinct gender differences in information seeking  
629 behaviour. *Health Info Libr J*. 2023 Mar 1;40(1):70–91.
- 630 41. van der Eijk Y, Tan Ping Ping G, Ong SE, Tan Li Xin G, Li D, Zhang D, et al. E-  
631 Cigarette Markets and Policy Responses in Southeast Asia: A Scoping Review. *Int J*  
632 *Health Policy Manag* [Internet]. 2022 Sep 1 [cited 2024 Aug 30];11(9):1616–24.  
633 Available from: <https://www.ncbi.nlm.nih.gov/pmc/articles/PMC9808234/>
- 634 42. Burrowes KS, Fuge C, Murray T, Amos J, Pitama S, Beckert L. An evaluation of a New  
635 Zealand “vape to quit smoking” programme. *New Zealand Medical Journal* [Internet].  
636 2022 Aug 19 [cited 2024 Aug 30];135(1560):45–55. Available from:  
637 [https://www.researchgate.net/publication/363231669\\_An\\_evaluation\\_of\\_a\\_New\\_Zealand\\_vape\\_to\\_quit\\_smoking\\_programme](https://www.researchgate.net/publication/363231669_An_evaluation_of_a_New_Zealand_vape_to_quit_smoking_programme)  
638
- 639 43. Shroff SM, Sreeramareddy CT. Marketing claims, promotional strategies, and product  
640 information on Malaysian e-cigarette retailer websites—a content analysis. *Subst Abuse*  
641 *Treatment, Prevention, and Policy* [Internet]. 2024 [cited 2024 Aug 30];19(1). Available  
642 from: <https://www.ncbi.nlm.nih.gov/pmc/articles/PMC10809498/>
- 643 44. Addo IY, Acquah E, Nyarko SH, Dickson KS, Boateng ENK, Ayebe C. Exposure to  
644 pro-tobacco and anti-tobacco media messages and events and smoking behaviour among  
645 adolescents in Gambia. *BMC Public Health* [Internet]. 2024 Apr 15 [cited 2024 Aug  
646 30];24. Available from:  
647 <https://bmcpublichealth.biomedcentral.com/articles/10.1186/s12889-024-18543-5>
- 648 45. Arduini-Van Hoose N. Adolescent Psychology [Internet]. 2020 [cited 2024 Feb 13].  
649 Available from: <https://adolescentpsychology.pressbooks.sunycreate.cloud/>
- 650 46. Langley T, Bell-Williams R, Pattinson J, Britton J, Bains M. ‘I felt welcomed in like  
651 they’re a little family in there, i felt like i was joining a team or something’: Vape shop  
652 customers’ experiences of E-cigarette use, vape shops and the vaping community. *Int J*  
653 *Environ Res Public Health* [Internet]. 2019 Jul 1 [cited 2024 Aug 30];16(13). Available  
654 from: <https://www.ncbi.nlm.nih.gov/pmc/articles/PMC6652145/>
- 655 47. Ali FRM, Dave DM, Colman GJ, Wang X, Saffer H, Marynak KL, et al. Association of  
656 e-cigarette advertising with e-cigarette and cigarette use among US adults. *Addiction*.  
657 2021 May 1;116(5):1212–23.
- 658 48. Collins L, Glasser AM, Abudayyeh H, Pearson JL, Villanti AC. E-cigarette marketing  
659 and communication: How E-Cigarette Companies Market E-Cigarettes and the Public  
660 Engages with E-cigarette Information. *Nicotine and Tobacco Research* [Internet]. 2019  
661 Jan 1 [cited 2024 Aug 30];21(1):14–24. Available from:  
662 <https://www.ncbi.nlm.nih.gov/pmc/articles/PMC6610165/>
- 663 49. Pickens J. Attitudes and Perceptions [Internet]. Borkowski N, editor. *Organizational*  
664 *Behavior in Health Care*. Sudbury, Massachusetts: Jones and Bartlett Publishers; 2005  
665 [cited 2024 Aug 30]. 43–75 p. Available from:

- 666 [https://www.researchgate.net/publication/267362543\\_Atitudes\\_and\\_Perceptions#full](https://www.researchgate.net/publication/267362543_Atitudes_and_Perceptions#full)  
667 [TextFileContent](#)
- 668 50. Farshidi H, Aghamolaei T, Hosseini Z, Nejad AG, Hosseini FA. Cigarette smoking  
669 based on prototype willingness model in male high school students. *Int J High Risk*  
670 *Behav Addict* [Internet]. 2017 Nov 1 [cited 2024 Aug 30];7(1). Available from:  
671 <https://brieflands.com/articles/ijhrba-63209>
- 672 51. Abadi MH, Lipperman-Kreda S, Shamblen SR, Thompson K, Grube JW, Leventhal  
673 AM, et al. The impact of flavored ENDS use among adolescents on daily use occasions  
674 and number of puffs, and next day intentions and willingness to vape. *Addictive*  
675 *Behaviors* [Internet]. 2021 Mar 1 [cited 2024 Aug 30];114. Available from:  
676 <https://www.ncbi.nlm.nih.gov/pmc/articles/PMC7785609/>
- 677 52. Barati M, Allahverdipour H, Hidarnia A, Niknami S. Predicting Tobacco Smoking  
678 Among Male Adolescents in Hamadan City, West of Iran in 2014: An Application of  
679 the Prototype Willingness Model. *J Res Health Sci* [Internet]. 2015 [cited 2024 Aug  
680 30];15(2):113–8. Available from:  
681 [https://www.researchgate.net/publication/280123218\\_Predicting\\_Tobacco\\_Smoking\\_](https://www.researchgate.net/publication/280123218_Predicting_Tobacco_Smoking_Among_Male_Adolescents_in_Hamadan_City_West_of_Iran_in_2014_An_Application_of_the_Prototype_Willingness_Model)  
682 [Among\\_Male\\_Adolescents\\_in\\_Hamadan\\_City\\_West\\_of\\_Iran\\_in\\_2014\\_An\\_Application\\_of\\_the\\_Prototype\\_Willingness\\_Model](#)
- 683 53. Alduraywish SA, Aldakheel FM, Alsuhaibani OS, Jabaan AD, Alballa RS, Alrashed  
684 AW, et al. Knowledge and Attitude toward E-Cigarettes among First Year University  
685 Students in Riyadh, Saudi Arabia. *Healthcare* [Internet]. 2023 Feb 1 [cited 2024 Aug  
686 30];11(4). Available from: <https://www.ncbi.nlm.nih.gov/pmc/articles/PMC9957237/>  
687  
688
- 689
